# Supplementary material for: Preparation of Thermoresponsive Polymer Nanogels of Oligo(Ethylene Glycol) Diacrylate-Methacrylic Acid and Their Property Characterization
Source: PubMed Central journal article supplement (PMC6045526; doi:10.1186/s11671-018-2610-6), 2018-07-13
Supplement: 11671_2018_2610_MOESM1_ESM.pdf [file 11671_2018_2610_MOESM1_ESM.pdf]

## Preparation of thermoresponsive polymer nanogels of oligo(ethylene glycol) diacrylate-methacrylic acid and their property characterization

Hongyan Cao, Fenghao Guo, Zhiyong Chen\* and Xiang Zheng Kong\*

College of Chemistry and Chemical Engineering, University of Jinan, Jinan 250022, China

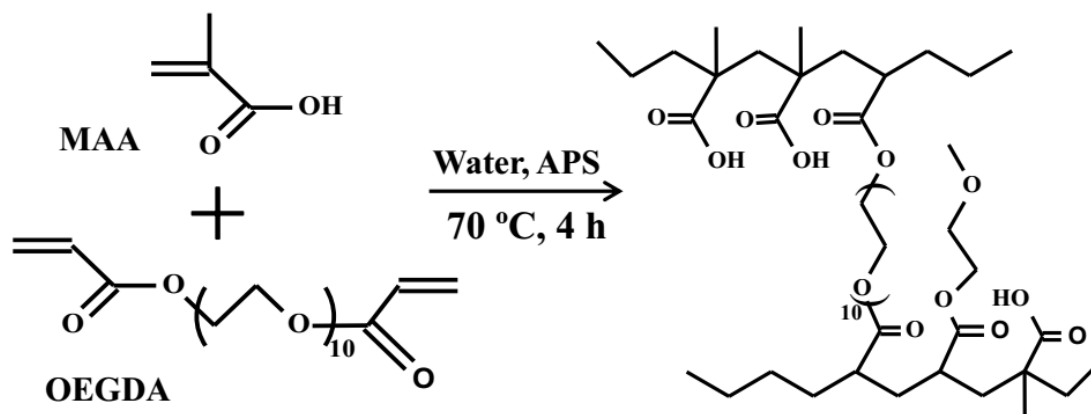

Figure S1. Illustration of the synthesis of thermoresponsive P(OEGDA-MAA)

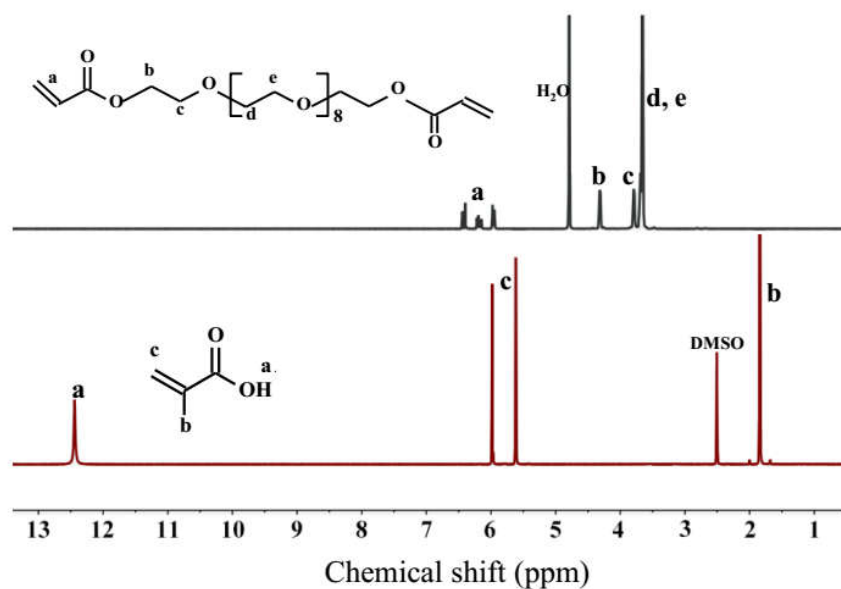

Figure S2. <sup>1</sup>H NMR spectra of the monomers, oligo(ethylene glycol) diacrylate and methacrylic acid, used in the synthesis of thermoresponsive P(OEGDA-MAA)

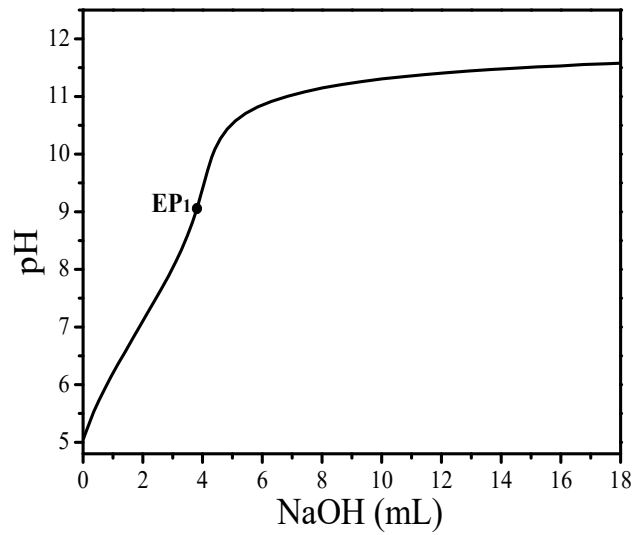

**Figure S3. Potentiometric titration of thermoresponsive P(OEGDA-MAA)**

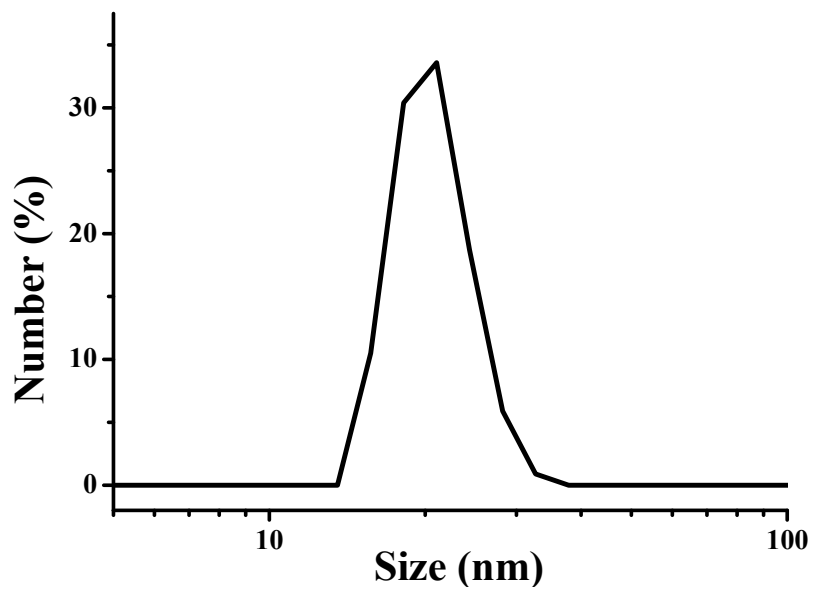

**Figure S4. DLS diameter of P(OEGDA-MAA) hydrogel in water (1 mg/mL) at room temperature**

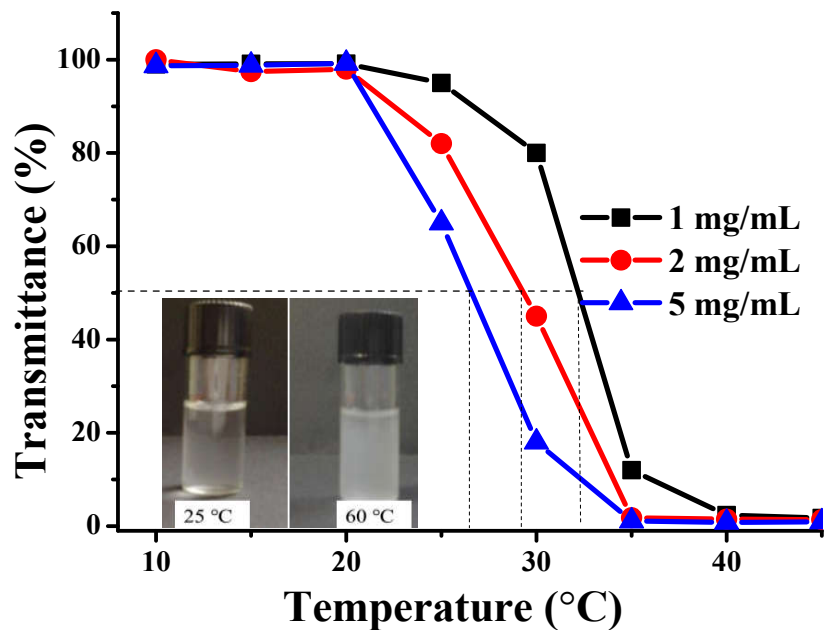

**Figure S5. Dependence of light transmittance on increasing temperature for aqueous dispersion of P(OEGDA-MAA) of different concentration (pH 1.0, 150 mM NaCl). The insets are the photos of the hydrogel at concentration of 1.0 mg/mL, taken at 25 °C and 60 °C, respectively.**
